# Supplementary material for: Antinociceptive modulation by the adhesion GPCR CIRL promotes mechanosensory signal discrimination
Source: eLife journal article supplement (doi:10.7554/elife.56738), 2020-09-30
Supplement: supp [file elife-56738-supp-v1.zip]

Archive with 4 entries (4 files):
- elife_poa_e56738_Transparent_Reporting_File.pdf
- elife_poa_e56738_Figure_4_figure_supplement_1.ai
- elife_poa_e56738_Figure_4_figure_supplement_2.ai
- elife_poa_e56738_Video_1.mov
